# Supplementary material for: Resistance training rejuvenates aging skin by reducing circulating inflammatory factors and enhancing dermal extracellular matrices
Source: PubMed Central journal article supplement (PMC10290068; doi:10.1038/s41598-023-37207-9), 2023-06-23
Supplement: 41598_2023_37207_MOESM1_ESM.pdf [file 41598_2023_37207_MOESM1_ESM.pdf]

**Resistance training rejuvenates aging skin by reducing circulating inflammatory factors and enhancing dermal extracellular matrices**

Shu Nishikori<sup>1,2</sup>, Jun Yasuda<sup>1</sup>, Kao Murata<sup>1</sup>, Junya Takegaki<sup>1</sup>, Yasuko Harada<sup>2</sup>, Yuki Shirai<sup>2</sup> and Satoshi Fujita<sup>1</sup>

<sup>1</sup> Faculty of Sports and Health Science, Ritsumeikan University, 1-1-1 Nojihigashi, Kusatsu, Japan

<sup>2</sup> Frontier Research Center, POLA Chemical Industries, Inc., 560 Kashio-cho, Totsuka-ku, Yokohama, Japan

Corresponding author:

\*Satoshi Fujita<sup>1</sup>

Tel: +81-077-561-5229, E-mail: [safujita@fc.ritsumei.ac.jp](mailto:safujita@fc.ritsumei.ac.jp)

Authors:

Shu Nishikori<sup>1,2</sup>

Tel: +81-090-2734-7983, E-mail: [s-nishikori@pola.co.jp](mailto:s-nishikori@pola.co.jp)

Jun Yasuda<sup>1</sup>

E-mail: [55fhyanh@gmail.com](mailto:55fhyanh@gmail.com)

Kao Murata<sup>1</sup>

E-mail: [chibimaru.ohana@gmail.com](mailto:chibimaru.ohana@gmail.com)

Junya Takegaki<sup>1</sup>

E-mail: [takegakij@gmail.com](mailto:takegakij@gmail.com)

Yasuko Harada<sup>2</sup>

E-mail: [ya-harada@pola.co.jp](mailto:ya-harada@pola.co.jp)

Yuki Shirai<sup>2</sup>

E-mail: [y-shirai@pola.co.jp](mailto:y-shirai@pola.co.jp)

**Extended Data 1. Characteristics of participants in the aerobic training and resistance training groups**

|                                  | All (n = 56)   | AT (n = 26)    | RT (n = 30)  | p-value           |
|----------------------------------|----------------|----------------|--------------|-------------------|
| Age, y                           | 48.5 ± 5.2     | 49.5 ± 5.1     | 47.7 ± 5.1   | 0.19              |
| Regular menstruation: Yes, n (%) | 27 (48)        | 10 (38)        | 17 (57)      | 0.17 <sup>a</sup> |
| Dietary intake                   |                |                |              |                   |
| Energy, kcal/day                 | 1805.4 ± 319.2 | 1837.1 ± 241.8 | 1774 ± 381.5 | 0.48              |
| Protein, g/day                   | 73.2 ± 13.4    | 73.6 ± 10.8    | 72.9 ± 15.8  | 0.85              |
| Fat, g/day                       | 68.9 ± 16.3    | 71.1 ± 13.6    | 66.8 ± 18.6  | 0.34              |
| Carbohydrate, g/day              | 214.0 ± 40.9   | 217.4 ± 33.1   | 210.8 ± 47.7 | 0.56              |
| Skin aging parameters            |                |                |              |                   |
| Skin elasticity, Ur/Uf           | 0.32 ± 0.05    | 0.32 ± 0.05    | 0.32 ± 0.05  | 0.60              |
| Dermal thickness, mm             | 1.74 ± 0.16    | 1.71 ± 0.19    | 1.77 ± 0.14  | 0.18              |
| Upper dermal LEP, %              | 27.0 ± 13.9    | 27.9 ± 15.4    | 26.3 ± 12.7  | 0.69              |
| Body composition                 |                |                |              |                   |
| Height, m                        | 1.61 ± 0.05    | 1.60 ± 0.06    | 1.61 ± 0.05  | 0.77              |
| Body weight, kg                  | 54.4 ± 6.1     | 54.2 ± 6.5     | 54.6 ± 5.8   | 0.84              |
| BMI, kg/m <sup>2</sup>           | 21.1 ± 1.6     | 21.0 ± 1.7     | 21.1 ± 1.5   | 0.94              |
| AppLTM, kg                       | 15.4 ± 1.8     | 15.4 ± 2.0     | 15.4 ± 1.7   | 0.87              |
| TotalLTM, kg                     | 36.5 ± 3.7     | 36.7 ± 4.1     | 36.4 ± 3.4   | 0.8               |
| Body fat, kg                     | 15.6 ± 4.1     | 15.2 ± 3.9     | 15.9 ± 4.4   | 0.57              |
| BMC, kg                          | 2.28 ± 0.30    | 2.25 ± 0.32    | 1.31 ± 0.28  | 0.47              |
| Physical capacity                |                |                |              |                   |
| VO <sub>2peak</sub> , mL/kg/min  | 28.0 ± 4.8     | 27.1 ± 0.9     | 28.7 ± 0.9   | 0.20              |
| 1-RM, kg                         |                |                |              |                   |
| Chest press                      | 11.5 ± 3.3     | 11.2 ± 3.2     | 11.8 ± 3.3   | 0.19              |
| Shoulder press                   | 15.7 ± 3.7     | 14.9 ± 3.8     | 16.3 ± 3.6   | 0.49              |
| Arm curl                         | 15.2 ± 3.4     | 15.0 ± 3.9     | 15.4 ± 3     | 0.30              |
| Rowing                           | 22.1 ± 4.0     | 21.7 ± 4.9     | 22.5 ± 3.1   | 0.30              |
| Leg curl                         | 43.4 ± 8.9     | 42.0 ± 10.1    | 44.6 ± 7.8   | 0.44              |
| Leg extension                    | 68.2 ± 17.8    | 65.5 ± 18.9    | 70.5 ± 16.7  | 0.15              |

Values show the means ± standard deviations (SDs). Statistical analyses were performed with two-sided independent *t* tests and <sup>a</sup>chi-squared test to compare the aerobic training and resistance training groups. AppLTM, appendicular lean soft tissue mass; AT, aerobic training; BMC, bone mineral content; BMI, body mass index; LEP, low echogenic pixel; RT, resistance training; TotalLTM, total lean soft tissue mass; VO<sub>2peak</sub>, peak oxygen uptake; 1-RM, one-repetition maximum

**Extended Data 2. Differences in the effect of aerobic training and resistance training on skin aging parameters, body composition, and physical capacity**

|                                  | ANCOVA 1 <sup>a</sup> |                  |         | ANCOVA 2 <sup>b</sup> |                  |         | ANCOVA 3 <sup>c</sup> |                |         |
|----------------------------------|-----------------------|------------------|---------|-----------------------|------------------|---------|-----------------------|----------------|---------|
|                                  | AT (n = 26)           | RT (n = 30)      | p value | AT (n = 26)           | RT (n = 30)      | p value | AT (n = 26)           | RT (n = 30)    | p value |
| <b>Skin aging parameters</b>     |                       |                  |         |                       |                  |         |                       |                |         |
| ΔSkin elasticity, Ur/Uf          | +0.045 ± 0.008        | +0.056 ± 0.007   | 0.29    | +0.042 ± 0.007        | +0.058 ± 0.007   | 0.13    | +0.043 ± 0.008        | +0.057 ± 0.007 | 0.16    |
| ΔDermal thickness, mm            | -0.014 ± 0.023        | +0.040 ± 0.021   | < 0.10  | -0.015 ± 0.023        | +0.041 ± 0.022   | < 0.10  | -0.014 ± 0.023        | +0.041 ± 0.022 | < 0.10  |
| ΔUpper dermal LEPs, %            | -12.1 ± 2.4           | -11.0 ± 2.2      | 0.98    | -12.1 ± 2.4           | -11.0 ± 2.2      | 0.98    | -12.1 ± 2.4           | -11.0 ± 2.2    | 0.88    |
| <b>Body composition</b>          |                       |                  |         |                       |                  |         |                       |                |         |
| ΔBody weight, kg                 | -0.73 ± 0.26          | -0.067 ± 0.25    | < 0.10  | -0.75 ± 0.27          | -0.046 ± 0.25    | < 0.10  |                       |                |         |
| ΔBMI, kg/m <sup>2</sup>          | -0.25 ± 0.10          | -0.0091 ± 0.0899 | < 0.10  | -0.26 ± 0.10          | +0.0019 ± 0.091  | < 0.10  |                       |                |         |
| ΔAppLTM, kg                      | +0.0062 ± 0.0733      | +0.24 ± 0.07     | < 0.05  | +0.021 ± 0.073        | +0.23 ± 0.07     | < 0.05  |                       |                |         |
| ΔTotalTM, kg                     | -0.054 ± 0.148        | +0.43 ± 0.14     | < 0.05  | -0.041 ± 0.150        | +0.42 ± 0.14     | < 0.05  |                       |                |         |
| ΔBody fat, kg                    | -0.36 ± 0.24          | -0.21 ± 0.23     | 0.67    | -0.40 ± 0.24          | -0.17 ± 0.22     | 0.49    |                       |                |         |
| ΔBMC, kg                         | -0.0085 ± 0.0069      | -0.0070 ± 0.0064 | 0.88    | -0.0079 ± 0.0070      | -0.0076 ± 0.0065 | 0.97    |                       |                |         |
| <b>Physical capacity</b>         |                       |                  |         |                       |                  |         |                       |                |         |
| ΔVO <sub>2peak</sub> , mL/kg/min | +1.01 ± 0.67          | +0.91 ± 0.62     | 0.91    | +1.06 ± 0.68          | +0.87 ± 0.63     | 0.84    |                       |                |         |
| Δ1-RM (kg)                       |                       |                  |         |                       |                  |         |                       |                |         |
| ΔChest press                     | +0.46 ± 0.32          | +5.9 ± 0.3       | < 0.001 | +0.49 ± 0.32          | +5.8 ± 0.3       | < 0.001 |                       |                |         |
| ΔShoulder press                  | +0.71 ± 0.50          | +7.5 ± 0.5       | < 0.001 | +0.73 ± 0.51          | +7.5 ± 0.5       | < 0.001 |                       |                |         |
| ΔArm curl                        | +0.54 ± 0.53          | +6.4 ± 0.5       | < 0.001 | +0.62 ± 0.53          | +6.3 ± 0.5       | < 0.001 |                       |                |         |
| ΔRowing                          | -0.94 ± 0.57          | +5.4 ± 0.5       | < 0.001 | -0.84 ± 0.57          | +5.3 ± 0.5       | < 0.001 |                       |                |         |
| ΔLeg curl                        | +0.48 ± 1.28          | +12.4 ± 1.2      | < 0.001 | +0.74 ± 1.24          | +12.2 ± 1.2      | < 0.001 |                       |                |         |
| ΔLeg extension                   | +2.6 ± 1.6            | +16.0 ± 1.5      | < 0.001 | +2.7 ± 1.7            | +15.9 ± 1.6      | < 0.001 |                       |                |         |

Values show the means of delta (Δ) calculated by subtracting the baseline value measured before the training intervention from the value measured after the training intervention, ± standard errors (SEs). Statistical analyses were performed with three types of analysis of co-variance by adjusting for <sup>a</sup>the baseline value measured before training intervention, <sup>b</sup>the baseline value measured before training intervention and menstruation regularity (regular or irregular), and <sup>c</sup>the baseline value measured before training intervention, <sup>b</sup>the baseline value measured before training intervention, <sup>b</sup>the baseline value measured before training intervention and menstruation regularity (regular/irregular or after menopause), and Δmelanin index as a measure of exposure to ultraviolet rays during the intervention period.

ANCOVA, analysis of co-variance; AppLTM, appendicular lean soft tissue mass; AT, aerobic training; BMC, bone mineral content; BMI, body mass index; LEP, low echogenic pixel; RT, resistance training; TotalLTM, total lean soft tissue mass; VO<sub>2peak</sub>, peak oxygen uptake; 1-RM, one-repetition maximum



**Extended Data 4. Blood factors that increased significantly after both aerobic training and resistance training**

| Blood factor        | Unit    | All (n=56)      |                 |          | AT (n=26)       |                 |         | RT (n=30)       |                 |          | Change ( $\Delta$ ) |                 |                      |
|---------------------|---------|-----------------|-----------------|----------|-----------------|-----------------|---------|-----------------|-----------------|----------|---------------------|-----------------|----------------------|
|                     |         | Before          | After           | p value  | Before          | After           | p value | Before          | After           | p value  | AT                  | RT              | p value <sup>a</sup> |
| IL-26               | FP      | 4.97 ± 0.69     | 7.25 ± 0.87     | < 0.001  | 5.65 ± 1.36     | 8.92 ± 1.34     | < 0.01  | 4.38 ± 0.54     | 5.80 ± 1.10     | < 0.05   | +3.27 ± 1.00        | +1.42 ± 1.00    | 0.20                 |
| Osteocalcin         | ng/mL   | 3.79 ± 0.27     | 4.46 ± 0.30     | < 0.0001 | 3.84 ± 0.50     | 4.29 ± 0.53     | < 0.01  | 3.76 ± 0.27     | 4.62 ± 0.33     | < 0.001  | +0.60 ± 0.30        | +0.71 ± 0.30    | 0.78                 |
| Osteopontin         | ng/mL   | 15.51 ± 0.75    | 18.63 ± 0.91    | < 0.001  | 16.21 ± 1.36    | 19.76 ± 1.46    | < 0.01  | 14.92 ± 0.76    | 17.66 ± 1.13    | < 0.01   | +3.55 ± 0.99        | +2.74 ± 0.99    | 0.61                 |
| Ghrelin             | FP      | 144.63 ± 43.85  | 356.91 ± 63.44  | < 0.0001 | 194.22 ± 86.20  | 340.72 ± 98.53  | < 0.05  | 101.66 ± 33.45  | 370.93 ± 83.56  | < 0.001  | +146.50 ± 80.54     | +269.28 ± 80.54 | 0.29                 |
| ANGPTL6             | ng/mL   | 4.67 ± 0.26     | 5.28 ± 0.30     | < 0.01   | 4.38 ± 0.33     | 4.85 ± 0.42     | < 0.05  | 4.91 ± 0.40     | 5.66 ± 0.43     | < 0.05   | +0.46 ± 0.30        | +0.76 ± 0.30    | 0.44                 |
| Angiopoietin-2      | ng/mL   | 1.81 ± 0.09     | 2.10 ± 0.12     | < 0.0001 | 1.79 ± 0.15     | 2.13 ± 0.21     | < 0.01  | 1.83 ± 0.12     | 2.08 ± 0.13     | < 0.001  | +0.34 ± 0.06        | +0.24 ± 0.06    | 0.44                 |
| Synuclein- $\alpha$ | pg/mL   | 490.64 ± 15.82  | 689.89 ± 23.82  | < 0.0001 | 486.17 ± 16.53  | 679.71 ± 43.88  | < 0.001 | 494.50 ± 26.09  | 698.72 ± 23.77  | < 0.0001 | +193.54 ± 31.45     | +204.21 ± 31.45 | 0.84                 |
| TGF- $\alpha$       | FP      | 20.94 ± 0.38    | 22.25 ± 0.48    | < 0.01   | 21.02 ± 0.60    | 22.19 ± 0.75    | < 0.05  | 20.87 ± 0.48    | 22.30 ± 0.63    | < 0.05   | +1.17 ± 0.71        | +1.43 ± 0.71    | 0.77                 |
| CCL14/HCC-1/HCC-3   | ng/mL   | 42.03 ± 1.07    | 44.81 ± 0.97    | < 0.0001 | 39.47 ± 1.62    | 42.88 ± 1.47    | < 0.001 | 44.24 ± 1.31    | 46.49 ± 1.23    | < 0.01   | +3.41 ± 0.81        | +2.25 ± 0.81    | 0.34                 |
| Glu                 | $\mu$ M | 43.10 ± 1.60    | 51.57 ± 2.31    | < 0.001  | 41.44 ± 1.84    | 52.57 ± 3.80    | < 0.01  | 44.55 ± 2.52    | 50.70 ± 2.82    | < 0.05   | +10.81 ± 2.49       | +5.60 ± 2.49    | 0.25                 |
| Homocitrulline      | $\mu$ M | 0.16 ± 0.01     | 0.19 ± 0.01     | < 0.001  | 0.16 ± 0.01     | 0.18 ± 0.02     | < 0.05  | 0.16 ± 0.01     | 0.19 ± 0.02     | < 0.01   | +0.26 ± 0.07        | +0.11 ± 0.07    | 0.22                 |
| SDMA                | $\mu$ M | 0.34 ± 0.01     | 0.38 ± 0.01     | < 0.0001 | 0.34 ± 0.01     | 0.38 ± 0.01     | < 0.01  | 0.34 ± 0.01     | 0.38 ± 0.01     | < 0.01   | +0.20 ± 0.09        | +0.35 ± 0.09    | 0.26                 |
| Urea                | $\mu$ M | 2100.02 ± 54.71 | 2280.97 ± 55.84 | < 0.001  | 2094.63 ± 84.06 | 2247.97 ± 84.58 | < 0.10  | 2104.70 ± 72.90 | 2309.57 ± 75.04 | < 0.01   | +82.73 ± 68.78      | +172.78 ± 68.78 | 0.35                 |

Values show the means  $\pm$  standard errors (SEs). The change value was calculated by subtracting the baseline value measured before the training intervention from the value measured after the training intervention. Statistical analyses were performed with two-sided paired *t* tests for the intragroup difference, <sup>a</sup>two-sided independent *t* tests for the intergroup difference, and <sup>b</sup>Wilcoxon signed-rank sum tests for the intragroup difference in the FI value.

AT, aerobic training; FI, fluorescence intensity; RT, resistance training



**Extended Data 6. Blood factors that increased significantly only after aerobic training**

| Blood factor                       | Unit    | All (n= 56)    |                |         | AT (n = 26)    |                |          | RT (n = 30)    |                |         | Change ( $\Delta$ ) |                |                      |
|------------------------------------|---------|----------------|----------------|---------|----------------|----------------|----------|----------------|----------------|---------|---------------------|----------------|----------------------|
|                                    |         | Before         | Alter          | p value | Before         | Alter          | p value  | Before         | Alter          | p value | AT                  | RT             | p value <sup>a</sup> |
| 25(OH)VitaminD                     | ng/mL   | 37.80 ± 11.89  | 32.09 ± 3.07   | 0.64    | 24.51 ± 2.88   | 34.09 ± 4.94   | < 0.05   | 49.32 ± 22.02  | 30.36 ± 3.86   | 0.40    | +9.59 ± 22.37       | -18.96 ± 22.37 | 0.24                 |
| Myonectin                          | ng/mL   | 2.03 ± 0.13    | 2.14 ± 0.13    | < 0.01  | 1.86 ± 0.06    | 2.01 ± 0.05    | < 0.01   | 2.17 ± 0.23    | 2.26 ± 0.24    | 0.16    | +0.14 ± 0.06        | +0.09 ± 0.06   | 0.47                 |
| IL-15                              | Ff      | -7.93 ± 1.06   | -6.32 ± 1.25   | < 0.05  | -8.41 ± 1.78   | -6.48 ± 1.67   | < 0.05   | -7.52 ± 1.25   | -6.18 ± 1.86   | 0.43    | +1.93 ± 0.94        | +1.34 ± 1.19   | 0.70                 |
| MPIF-1/CCL23                       | pg/mL   | 146.02 ± 11.61 | 158.21 ± 13.35 | < 0.05  | 146.44 ± 17.69 | 160.84 ± 19.73 | < 0.05   | 145.65 ± 15.60 | 155.94 ± 18.44 | 0.16    | +14.41 ± 7.12       | +10.28 ± 7.12  | 0.67                 |
| CD163                              | ng/mL   | 94.57 ± 5.13   | 98.88 ± 5.37   | 0.12    | 92.11 ± 7.80   | 103.46 ± 7.35  | < 0.001  | 96.70 ± 6.89   | 94.91 ± 7.78   | 0.67    | +11.34 ± 4.13       | -1.79 ± 4.13   | < 0.05               |
| Chitinase 3-like 1                 | ng/mL   | 15.42 ± 1.05   | 15.68 ± 1.10   | 0.67    | 14.71 ± 1.07   | 17.75 ± 1.94   | < 0.10   | 16.03 ± 1.73   | 13.83 ± 1.07   | 0.22    | +3.04 ± 1.63        | -2.66 ± 1.63   | < 0.05               |
| IL-6Ra                             | ng/mL   | 9.03 ± 0.40    | 9.47 ± 0.43    | 0.12    | 8.36 ± 0.61    | 9.48 ± 0.49    | < 0.01   | 9.62 ± 0.53    | 9.47 ± 0.69    | 0.71    | +1.12 ± 0.39        | -0.14 ± 0.39   | < 0.05               |
| IL-12(p70)                         | Ff      | -2.85 ± 0.42   | -2.70 ± 0.38   | 0.33    | -2.90 ± 0.85   | -2.50 ± 0.66   | < 0.10   | -2.80 ± 0.29   | -2.87 ± 0.44   | 0.63    | +0.40 ± 0.43        | -0.07 ± 0.43   | 0.45                 |
| IL-34                              | Ff      | -25.17 ± 1.49  | -23.83 ± 1.53  | < 0.01  | -27.03 ± 2.87  | -23.9 ± 2.62   | < 0.05   | -23.56 ± 1.24  | -23.76 ± 1.79  | 0.24    | +3.13 ± 1.59        | -0.20 ± 1.59   | < 0.10               |
| IL-35                              | Ff      | -7.21 ± 1.84   | -5.75 ± 2.14   | < 0.10  | -8.15 ± 3.53   | -3.84 ± 2.93   | < 0.05   | -6.39 ± 1.63   | -7.41 ± 3.10   | 0.66    | +4.31 ± 2.49        | -1.02 ± 2.49   | 0.11                 |
| MMP-2                              | ng/mL   | 80.10 ± 3.85   | 92.00 ± 5.09   | < 0.01  | 79.61 ± 5.51   | 93.72 ± 5.84   | < 0.0001 | 80.52 ± 5.46   | 90.50 ± 8.14   | 0.13    | +14.11 ± 6.33       | +9.98 ± 6.33   | 0.58                 |
| Pentraxin-3                        | ng/mL   | 11.71 ± 0.75   | 12.87 ± 0.79   | < 0.10  | 11.87 ± 1.37   | 13.02 ± 1.18   | < 0.10   | 11.57 ± 0.76   | 12.75 ± 1.08   | 0.22    | +1.15 ± 0.94        | +1.18 ± 0.94   | 0.98                 |
| TSLP                               | Ff      | 10.45 ± 1.10   | 11.54 ± 1.23   | < 0.10  | 12.02 ± 2.19   | 13.87 ± 2.16   | < 0.10   | 9.08 ± 0.76    | 9.52 ± 1.24    | 0.46    | +1.85 ± 1.15        | +0.43 ± 1.15   | 0.34                 |
| TWEAK/TNFSF12                      | pg/mL   | 354.66 ± 15.48 | 371.33 ± 13.17 | 0.13    | 347.80 ± 28.34 | 392.14 ± 17.64 | < 0.05   | 360.61 ± 15.68 | 352.68 ± 18.94 | 0.63    | +44.34 ± 18.13      | -19.69 ± 18.13 | < 0.05               |
| IL-33                              | Ff      | -4.89 ± 0.27   | -4.76 ± 0.27   | 0.42    | -4.81 ± 0.36   | -4.37 ± 0.35   | < 0.10   | -4.97 ± 0.40   | -5.10 ± 0.39   | 0.38    | +0.44 ± 0.16        | -0.13 ± 0.16   | < 0.05               |
| Erythropoietin                     | Ff      | -7.46 ± 0.80   | -7.43 ± 0.81   | 0.63    | -8.27 ± 1.14   | -7.62 ± 1.19   | < 0.05   | -6.75 ± 1.12   | -7.27 ± 1.11   | 0.23    | +0.65 ± 0.45        | -0.52 ± 0.45   | < 0.05               |
| FSH                                | mIU/mL  | 33.66 ± 5.24   | 43.88 ± 7.27   | < 0.01  | 38.86 ± 8.03   | 48.57 ± 10.25  | < 0.05   | 28.85 ± 6.82   | 39.37 ± 10.41  | 0.11    | +11.2 ± 5.68        | +9.47 ± 5.68   | 0.81                 |
| MIA                                | pg/mL   | 846.98 ± 44.15 | 891.83 ± 44.99 | < 0.01  | 816.52 ± 61.96 | 887.18 ± 66.38 | < 0.01   | 873.38 ± 63.09 | 895.86 ± 62.23 | 0.26    | +70.66 ± 19.42      | +22.48 ± 19.42 | 0.12                 |
| Park7/DJ-1                         | ng/mL   | 11.56 ± 0.57   | 12.25 ± 0.73   | 0.33    | 10.60 ± 0.49   | 12.59 ± 1.34   | < 0.10   | 12.38 ± 0.96   | 11.95 ± 0.73   | 0.61    | +1.99 ± 0.84        | -0.43 ± 0.84   | < 0.10               |
| 1-Methylnicotinamide               | $\mu$ M | 0.32 ± 0.02    | 0.40 ± 0.02    | < 0.01  | 0.30 ± 0.03    | 0.45 ± 0.04    | < 0.01   | 0.33 ± 0.03    | 0.35 ± 0.03    | 0.56    | +0.22 ± 0.09        | +0.09 ± 0.09   | 0.24                 |
| ADWA                               | $\mu$ M | 0.35 ± 0.01    | 0.37 ± 0.01    | 0.11    | 0.34 ± 0.01    | 0.38 ± 0.01    | < 0.05   | 0.36 ± 0.01    | 0.36 ± 0.01    | 0.83    | +0.30 ± 0.09        | +0.01 ± 0.09   | < 0.05               |
| Guantinosuccinic acid              | $\mu$ M | 0.34 ± 0.02    | 0.37 ± 0.02    | < 0.05  | 0.30 ± 0.03    | 0.35 ± 0.04    | < 0.10   | 0.37 ± 0.03    | 0.38 ± 0.03    | 0.35    | +0.12 ± 0.08        | +0.12 ± 0.08   | 1.00                 |
| His                                | $\mu$ M | 131.5 ± 2.26   | 133.6 ± 2.20   | 0.23    | 129.49 ± 3.27  | 133.50 ± 3.12  | < 0.10   | 133.25 ± 3.15  | 133.69 ± 3.14  | 0.87    | +2.98 ± 2.56        | +0.79 ± 2.56   | 0.52                 |
| Homocysteine                       | $\mu$ M | 1.84 ± 0.07    | 2.04 ± 0.10    | < 0.05  | 1.91 ± 0.13    | 2.15 ± 0.17    | < 0.05   | 1.78 ± 0.08    | 1.94 ± 0.12    | 0.16    | +0.29 ± 0.12        | +0.18 ± 0.12   | 0.51                 |
| Lys                                | $\mu$ M | 342.53 ± 7.10  | 356.24 ± 8.33  | 0.14    | 341.98 ± 10.46 | 370.27 ± 14.35 | < 0.10   | 343.01 ± 9.83  | 344.07 ± 8.99  | 0.92    | +23.07 ± 9.99       | -4.00 ± 9.99   | 0.12                 |
| Mucic acid                         | $\mu$ M | 4.47 ± 0.23    | 4.90 ± 0.22    | < 0.05  | 4.42 ± 0.32    | 4.97 ± 0.36    | < 0.10   | 4.51 ± 0.34    | 4.84 ± 0.27    | 0.19    | +0.60 ± 0.25        | +0.32 ± 0.25   | 0.48                 |
| N1-Methyl-4-pyridone-5-carboxamide | $\mu$ M | 0.31 ± 0.01    | 0.36 ± 0.02    | < 0.05  | 0.28 ± 0.02    | 0.36 ± 0.02    | < 0.05   | 0.33 ± 0.02    | 0.35 ± 0.03    | 0.41    | +0.17 ± 0.08        | +0.03 ± 0.08   | 0.22                 |
| Ornithine                          | $\mu$ M | 65.49 ± 1.64   | 68.52 ± 2.30   | 0.18    | 67.96 ± 2.03   | 74.73 ± 4.18   | < 0.10   | 63.34 ± 2.48   | 63.13 ± 1.89   | 0.94    | +5.04 ± 2.57        | +0.14 ± 2.57   | 0.25                 |

Values show the means ± standard errors (SEs). The change value was calculated as delta ( $\Delta$ ) by subtracting the baseline value measured before training intervention from the value measured after training intervention. Statistical analyses were performed with two-sided paired *t* tests for the intragroup difference, <sup>a</sup>two-sided independent *t* tests for the intergroup difference, and <sup>b</sup>Wilcoxon signed-rank sum tests for the intragroup difference in the FI value. AT, aerobic training; FI, fluorescence intensity; IU, international unit; RT, resistance training

**Extended Data 7. Blood factors that decreased significantly only after resistance training**

| Blood factor               | Unit       | All (n = 56)    |                 |         | AT (n = 26)     |                 |         | RT (n = 30)    |                |         | Change ( $\Delta$ ) |                |                      |
|----------------------------|------------|-----------------|-----------------|---------|-----------------|-----------------|---------|----------------|----------------|---------|---------------------|----------------|----------------------|
|                            |            | Before          | After           | p value | Before          | After           | p value | Before         | After          | p value | AT                  | RT             | p value <sup>a</sup> |
| MCP-3                      | FP         | -3.34 ± 0.55    | -3.62 ± 0.56    | 0.11    | -2.48 ± 0.76    | -2.63 ± 0.74    | 0.64    | -4.09 ± 0.79   | -4.47 ± 0.82   | < 0.10  | -0.15 ± 0.32        | -0.39 ± 0.32   | 0.60                 |
| MIG                        | pg/mL      | 185.63 ± 61.71  | 117.34 ± 9.35   | 0.25    | 254.77 ± 132.52 | 130.6 ± 18.32   | 0.34    | 125.71 ± 9.80  | 105.85 ± 6.98  | < 0.05  | -124.18 ± 7.54      | -19.86 ± 7.54  | 0.38                 |
| ENA-78/CXCL5               | ng/mL      | 1.08 ± 0.39     | 1.20 ± 0.52     | 0.51    | 1.46 ± 0.85     | 1.76 ± 1.16     | 0.39    | 0.77 ± 0.09    | 0.73 ± 0.09    | < 0.10  | +0.21 ± 0.03        | -0.07 ± 0.03   | 0.23                 |
| Eotaxin-2/CCL24            | pg/mL      | 63.51 ± 3.36    | 61.49 ± 3.36    | 0.34    | 63.92 ± 5.83    | 65.09 ± 5.91    | 0.73    | 63.16 ± 3.82   | 58.37 ± 3.64   | < 0.10  | +1.16 ± 2.63        | -4.79 ± 2.63   | 0.16                 |
| I-TAC/CXCL11               | pg/mL      | 15.79 ± 2.37    | 11.44 ± 1.00    | < 0.10  | 17.83 ± 4.73    | 11.52 ± 1.54    | 0.21    | 14.01 ± 1.71   | 11.37 ± 1.33   | < 0.05  | -6.31 ± 1.07        | -2.64 ± 1.07   | 0.44                 |
| MCP-2/CCL8                 | pg/mL      | 66.76 ± 11.99   | 48.70 ± 2.99    | 0.11    | 81.22 ± 24.51   | 52.41 ± 3.81    | 0.23    | 54.24 ± 6.95   | 45.49 ± 4.47   | < 0.10  | -28.81 ± 4.87       | -8.75 ± 4.87   | 0.37                 |
| MIP-1 $\alpha$ /CCL15      | ng/mL      | 4.45 ± 0.36     | 4.00 ± 0.28     | < 0.10  | 4.50 ± 0.49     | 3.94 ± 0.33     | 0.45    | 4.39 ± 0.54    | 4.05 ± 0.45    | < 0.05  | -0.69 ± 0.43        | -0.17 ± 0.43   | 0.45                 |
| MIP-3 $\beta$ /CCL19       | pg/mL      | 44.80 ± 2.65    | 40.50 ± 1.54    | < 0.10  | 48.42 ± 5.08    | 41.69 ± 2.27    | 0.14    | 41.65 ± 2.20   | 39.47 ± 2.12   | < 0.10  | -6.73 ± 1.27        | -2.19 ± 1.27   | 0.30                 |
| IL-17F                     | FP         | 3.63 ± 0.71     | 3.49 ± 0.72     | 0.13    | 2.52 ± 1.06     | 2.48 ± 1.11     | 0.61    | 4.59 ± 0.93    | 4.36 ± 0.91    | < 0.10  | -0.04 ± 0.13        | -0.23 ± 0.13   | 0.47                 |
| IL-23                      | FP         | -1.25 ± 0.14    | -1.46 ± 0.14    | 0.15    | -1.33 ± 0.21    | -1.17 ± 0.19    | 0.45    | -1.18 ± 0.20   | -1.70 ± 0.20   | < 0.01  | +0.15 ± 0.19        | -0.52 ± 0.19   | < 0.05               |
| IL-31                      | FP         | 4.63 ± 0.76     | 4.46 ± 0.77     | 0.15    | 3.10 ± 1.09     | 3.19 ± 1.10     | 0.82    | 5.97 ± 1.00    | 5.57 ± 1.05    | < 0.05  | +0.10 ± 0.20        | -0.40 ± 0.20   | < 0.10               |
| CD40LG                     | pg/mL      | 245.03 ± 11.38  | 191.94 ± 13.42  | < 0.001 | 224.73 ± 15.42  | 200.08 ± 22.75  | 0.19    | 261.95 ± 16.02 | 184.87 ± 15.71 | < 0.001 | -16.00 ± 21.05      | -77.07 ± 21.05 | < 0.05               |
| FGF21                      | FP         | -269.30 ± 12.32 | -280.74 ± 10.92 | < 0.001 | -253.92 ± 25.00 | -260.98 ± 22.46 | 0.20    | -282.63 ± 7.59 | -297.87 ± 4.82 | < 0.001 | -7.06 ± 5.52        | -15.23 ± 5.52  | 0.34                 |
| CCL28                      | pg/mL      | 145.99 ± 9.40   | 128.75 ± 9.73   | < 0.10  | 132.45 ± 6.87   | 132.88 ± 16.68  | 0.98    | 157.71 ± 16.36 | 125.17 ± 11.22 | < 0.05  | +0.43 ± 12.61       | -32.54 ± 12.61 | < 0.10               |
| ANGPTL3                    | ng/mL      | 45.71 ± 2.61    | 43.46 ± 2.71    | 0.14    | 45.47 ± 4.15    | 44.08 ± 4.50    | 0.59    | 45.91 ± 3.35   | 42.92 ± 3.31   | < 0.10  | -1.38 ± 1.74        | -3.00 ± 1.74   | 0.60                 |
| GDNF                       | pg/mL      | 4.36 ± 0.20     | 4.11 ± 0.19     | < 0.05  | 4.38 ± 0.34     | 4.19 ± 0.29     | 0.23    | 4.34 ± 0.23    | 4.04 ± 0.24    | < 0.10  | -0.19 ± 0.16        | -0.30 ± 0.16   | 0.62                 |
| D-Dimer + FDPs             | ng/mL      | 2.83 ± 0.33     | 2.01 ± 0.17     | < 0.05  | 1.85 ± 0.13     | 2.01 ± 0.28     | 0.54    | 3.65 ± 0.55    | 2.01 ± 0.22    | < 0.01  | +0.23 ± 0.56        | -1.63 ± 0.56   | < 0.01               |
| Reg3A                      | ng/mL      | 6.78 ± 0.49     | 6.39 ± 0.43     | < 0.10  | 6.70 ± 0.68     | 6.48 ± 0.58     | 0.49    | 6.85 ± 0.71    | 6.32 ± 0.64    | < 0.05  | -0.23 ± 0.24        | -0.53 ± 0.24   | 0.44                 |
| Progranulin/PGRN           | ng/mL      | 37.23 ± 2.11    | 33.68 ± 1.05    | < 0.05  | 38.5 ± 4.09     | 33.06 ± 1.91    | 0.13    | 36.14 ± 1.79   | 34.21 ± 1.07   | < 0.05  | -5.44 ± 0.91        | -1.93 ± 0.91   | 0.30                 |
| Complement Factor D/Adpsin | $\mu$ g/mL | 3.07 ± 0.09     | 2.83 ± 0.07     | < 0.001 | 2.95 ± 0.10     | 2.81 ± 0.11     | 0.12    | 3.18 ± 0.13    | 2.85 ± 0.10    | < 0.001 | -0.14 ± 0.08        | -0.32 ± 0.08   | 0.13                 |
| MSP/MST1                   | $\mu$ g/mL | 2.69 ± 0.07     | 2.58 ± 0.06     | < 0.05  | 2.55 ± 0.06     | 2.50 ± 0.08     | 0.36    | 2.81 ± 0.12    | 2.65 ± 0.09    | < 0.05  | -0.04 ± 0.06        | -0.16 ± 0.06   | 0.14                 |
| LBP                        | $\mu$ g/mL | 5.91 ± 0.28     | 5.31 ± 0.15     | < 0.05  | 6.16 ± 0.54     | 5.48 ± 0.25     | 0.19    | 5.69 ± 0.24    | 5.16 ± 0.18    | < 0.05  | -0.69 ± 0.21        | -0.53 ± 0.21   | 0.76                 |
| CXCL4/PF4                  | $\mu$ g/mL | 11.17 ± 1.22    | 8.82 ± 0.77     | < 0.10  | 11.18 ± 2.18    | 8.30 ± 0.97     | 0.22    | 11.16 ± 1.32   | 9.26 ± 1.18    | < 0.10  | -2.87 ± 1.11        | -1.90 ± 1.11   | 0.69                 |
| ADP                        | $\mu$ M    | 1.23 ± 0.11     | 1.06 ± 0.09     | < 0.10  | 0.98 ± 0.12     | 1.01 ± 0.14     | 0.64    | 1.45 ± 0.17    | 1.10 ± 0.12    | < 0.10  | -0.21 ± 0.20        | -0.43 ± 0.20   | 0.38                 |
| Ethanolamine phosphate     | $\mu$ M    | 4.15 ± 0.20     | 3.46 ± 0.18     | < 0.01  | 3.77 ± 0.29     | 3.29 ± 0.29     | 0.14    | 4.47 ± 0.26    | 3.61 ± 0.23    | < 0.05  | -0.48 ± 0.33        | -0.91 ± 0.33   | 0.34                 |
| NIN-Dimethylglycine        | $\mu$ M    | 6.95 ± 0.42     | 6.53 ± 0.46     | < 0.10  | 7.71 ± 0.80     | 7.34 ± 0.92     | 0.40    | 6.29 ± 0.32    | 5.83 ± 0.27    | < 0.05  | -0.39 ± 0.21        | -0.45 ± 0.21   | 0.90                 |
| Nicotinamide               | $\mu$ M    | 0.35 ± 0.02     | 0.30 ± 0.01     | < 0.05  | 0.32 ± 0.02     | 0.29 ± 0.02     | 0.15    | 0.37 ± 0.02    | 0.32 ± 0.02    | < 0.05  | -0.10 ± 0.08        | -0.10 ± 0.08   | 0.98                 |

Values show the means  $\pm$  standard errors (SEs). The change value was calculated as delta ( $\Delta$ ) by subtracting the baseline value measured before the training intervention from the value measured after the training intervention. Statistical analyses were performed with two-sided paired *t* tests for the intragroup difference, <sup>a</sup>two-sided independent *t* tests for the intergroup difference, and <sup>b</sup>Wilcoxon signed-rank sum tests for the intragroup difference in the FI value. AT, aerobic training; FI, fluorescence intensity; RT, resistance training





Supplementary Table 1. Circulating factors measured in this study

| Measurement Panel/Method             | Catalog No.                                                                                                                                                                                                                                                                                                                                                                                                                                                                                                                                                                                                                                                                                                                                                                                            | Measured circulating factors (>1,487) | Process Ref. |
|--------------------------------------|--------------------------------------------------------------------------------------------------------------------------------------------------------------------------------------------------------------------------------------------------------------------------------------------------------------------------------------------------------------------------------------------------------------------------------------------------------------------------------------------------------------------------------------------------------------------------------------------------------------------------------------------------------------------------------------------------------------------------------------------------------------------------------------------------------|---------------------------------------|--------------|
| Bio-Plex Cytokine panel              | # F-12007283                                                                                                                                                                                                                                                                                                                                                                                                                                                                                                                                                                                                                                                                                                                                                                                           | β-NGF                                 |              |
|                                      |                                                                                                                                                                                                                                                                                                                                                                                                                                                                                                                                                                                                                                                                                                                                                                                                        | IL-1Ra                                | IL-1α        |
|                                      |                                                                                                                                                                                                                                                                                                                                                                                                                                                                                                                                                                                                                                                                                                                                                                                                        | IL-16                                 | IL-13        |
|                                      |                                                                                                                                                                                                                                                                                                                                                                                                                                                                                                                                                                                                                                                                                                                                                                                                        | IL-17A                                | IL-15        |
|                                      |                                                                                                                                                                                                                                                                                                                                                                                                                                                                                                                                                                                                                                                                                                                                                                                                        | IL-18                                 | IL-17        |
|                                      |                                                                                                                                                                                                                                                                                                                                                                                                                                                                                                                                                                                                                                                                                                                                                                                                        | IL-27                                 | IL-18        |
|                                      |                                                                                                                                                                                                                                                                                                                                                                                                                                                                                                                                                                                                                                                                                                                                                                                                        | IL-27 (p28)                           | IL-19        |
|                                      |                                                                                                                                                                                                                                                                                                                                                                                                                                                                                                                                                                                                                                                                                                                                                                                                        | IL-29/IFN-λ1                          | IL-20        |
|                                      |                                                                                                                                                                                                                                                                                                                                                                                                                                                                                                                                                                                                                                                                                                                                                                                                        | Osteocalcin                           | IL-21        |
|                                      |                                                                                                                                                                                                                                                                                                                                                                                                                                                                                                                                                                                                                                                                                                                                                                                                        | Osteonectin                           | IL-22        |
| Bio-Plex Chemokine panel             | # F-171-AV98MR2-20                                                                                                                                                                                                                                                                                                                                                                                                                                                                                                                                                                                                                                                                                                                                                                                     | 6Kine/CCL21                           | IL-23        |
|                                      |                                                                                                                                                                                                                                                                                                                                                                                                                                                                                                                                                                                                                                                                                                                                                                                                        | MCP-2/CCL8                            | IL-24        |
|                                      |                                                                                                                                                                                                                                                                                                                                                                                                                                                                                                                                                                                                                                                                                                                                                                                                        | APRIL/TNFSF3                          | IL-25        |
|                                      |                                                                                                                                                                                                                                                                                                                                                                                                                                                                                                                                                                                                                                                                                                                                                                                                        | IL-8Ra                                | IL-26        |
|                                      |                                                                                                                                                                                                                                                                                                                                                                                                                                                                                                                                                                                                                                                                                                                                                                                                        | IL-27                                 | IL-27        |
| Bio-Plex Inflammation panel          | # F-171-AL001M                                                                                                                                                                                                                                                                                                                                                                                                                                                                                                                                                                                                                                                                                                                                                                                         | IL-1Ra                                | IL-1α        |
|                                      |                                                                                                                                                                                                                                                                                                                                                                                                                                                                                                                                                                                                                                                                                                                                                                                                        | IL-29/IFN-λ1                          | IL-13        |
|                                      |                                                                                                                                                                                                                                                                                                                                                                                                                                                                                                                                                                                                                                                                                                                                                                                                        | Osteocalcin                           | IL-15        |
|                                      |                                                                                                                                                                                                                                                                                                                                                                                                                                                                                                                                                                                                                                                                                                                                                                                                        | IL-17F                                | IL-17        |
|                                      |                                                                                                                                                                                                                                                                                                                                                                                                                                                                                                                                                                                                                                                                                                                                                                                                        | Apelin                                | IL-18        |
|                                      |                                                                                                                                                                                                                                                                                                                                                                                                                                                                                                                                                                                                                                                                                                                                                                                                        | Ghrelin                               | IL-19        |
|                                      |                                                                                                                                                                                                                                                                                                                                                                                                                                                                                                                                                                                                                                                                                                                                                                                                        | ACTH                                  | IL-20        |
|                                      |                                                                                                                                                                                                                                                                                                                                                                                                                                                                                                                                                                                                                                                                                                                                                                                                        | Cortisol                              | IL-21        |
|                                      |                                                                                                                                                                                                                                                                                                                                                                                                                                                                                                                                                                                                                                                                                                                                                                                                        | IGF-1                                 | IL-22        |
|                                      |                                                                                                                                                                                                                                                                                                                                                                                                                                                                                                                                                                                                                                                                                                                                                                                                        | IGF-1                                 | IL-23        |
| Bio-Plex Th17 Cytokine panel         | # F-BP-HTH17-plex07                                                                                                                                                                                                                                                                                                                                                                                                                                                                                                                                                                                                                                                                                                                                                                                    | IL-17A                                | IL-17        |
|                                      |                                                                                                                                                                                                                                                                                                                                                                                                                                                                                                                                                                                                                                                                                                                                                                                                        | IL-17F                                | IL-17        |
|                                      |                                                                                                                                                                                                                                                                                                                                                                                                                                                                                                                                                                                                                                                                                                                                                                                                        | IL-17R                                | IL-17        |
|                                      |                                                                                                                                                                                                                                                                                                                                                                                                                                                                                                                                                                                                                                                                                                                                                                                                        | IL-17RC                               | IL-17        |
|                                      |                                                                                                                                                                                                                                                                                                                                                                                                                                                                                                                                                                                                                                                                                                                                                                                                        | IL-17E                                | IL-17        |
|                                      |                                                                                                                                                                                                                                                                                                                                                                                                                                                                                                                                                                                                                                                                                                                                                                                                        | IL-17F1                               | IL-17        |
|                                      |                                                                                                                                                                                                                                                                                                                                                                                                                                                                                                                                                                                                                                                                                                                                                                                                        | IL-17F2                               | IL-17        |
|                                      |                                                                                                                                                                                                                                                                                                                                                                                                                                                                                                                                                                                                                                                                                                                                                                                                        | IL-17F3                               | IL-17        |
|                                      |                                                                                                                                                                                                                                                                                                                                                                                                                                                                                                                                                                                                                                                                                                                                                                                                        | IL-17F4                               | IL-17        |
|                                      |                                                                                                                                                                                                                                                                                                                                                                                                                                                                                                                                                                                                                                                                                                                                                                                                        | IL-17F5                               | IL-17        |
| Mullepex Myokine panel               | # F-MIL-HWOMAG-89K-08                                                                                                                                                                                                                                                                                                                                                                                                                                                                                                                                                                                                                                                                                                                                                                                  | IL-1Ra                                | IL-1α        |
|                                      |                                                                                                                                                                                                                                                                                                                                                                                                                                                                                                                                                                                                                                                                                                                                                                                                        | IL-16                                 | IL-13        |
|                                      |                                                                                                                                                                                                                                                                                                                                                                                                                                                                                                                                                                                                                                                                                                                                                                                                        | IL-17A                                | IL-15        |
|                                      |                                                                                                                                                                                                                                                                                                                                                                                                                                                                                                                                                                                                                                                                                                                                                                                                        | IL-18                                 | IL-17        |
|                                      |                                                                                                                                                                                                                                                                                                                                                                                                                                                                                                                                                                                                                                                                                                                                                                                                        | IL-27                                 | IL-18        |
|                                      |                                                                                                                                                                                                                                                                                                                                                                                                                                                                                                                                                                                                                                                                                                                                                                                                        | IL-27 (p28)                           | IL-19        |
|                                      |                                                                                                                                                                                                                                                                                                                                                                                                                                                                                                                                                                                                                                                                                                                                                                                                        | IL-29/IFN-λ1                          | IL-20        |
|                                      |                                                                                                                                                                                                                                                                                                                                                                                                                                                                                                                                                                                                                                                                                                                                                                                                        | Osteocalcin                           | IL-21        |
|                                      |                                                                                                                                                                                                                                                                                                                                                                                                                                                                                                                                                                                                                                                                                                                                                                                                        | Osteonectin                           | IL-22        |
|                                      |                                                                                                                                                                                                                                                                                                                                                                                                                                                                                                                                                                                                                                                                                                                                                                                                        | Osteopontin                           | IL-23        |
| Mullepex Metabolic Hormone panel     | # F-MIL-HWEMAG-5HK-07                                                                                                                                                                                                                                                                                                                                                                                                                                                                                                                                                                                                                                                                                                                                                                                  | IL-1Ra                                | IL-1α        |
|                                      |                                                                                                                                                                                                                                                                                                                                                                                                                                                                                                                                                                                                                                                                                                                                                                                                        | IL-16                                 | IL-13        |
|                                      |                                                                                                                                                                                                                                                                                                                                                                                                                                                                                                                                                                                                                                                                                                                                                                                                        | IL-17A                                | IL-15        |
|                                      |                                                                                                                                                                                                                                                                                                                                                                                                                                                                                                                                                                                                                                                                                                                                                                                                        | IL-18                                 | IL-17        |
|                                      |                                                                                                                                                                                                                                                                                                                                                                                                                                                                                                                                                                                                                                                                                                                                                                                                        | IL-27                                 | IL-18        |
|                                      |                                                                                                                                                                                                                                                                                                                                                                                                                                                                                                                                                                                                                                                                                                                                                                                                        | IL-27 (p28)                           | IL-19        |
|                                      |                                                                                                                                                                                                                                                                                                                                                                                                                                                                                                                                                                                                                                                                                                                                                                                                        | IL-29/IFN-λ1                          | IL-20        |
|                                      |                                                                                                                                                                                                                                                                                                                                                                                                                                                                                                                                                                                                                                                                                                                                                                                                        | Osteocalcin                           | IL-21        |
|                                      |                                                                                                                                                                                                                                                                                                                                                                                                                                                                                                                                                                                                                                                                                                                                                                                                        | Osteonectin                           | IL-22        |
|                                      |                                                                                                                                                                                                                                                                                                                                                                                                                                                                                                                                                                                                                                                                                                                                                                                                        | Osteopontin                           | IL-23        |
| Mullepex Pituitary panel             | # F-MIL-HPT1MAG-66K-05                                                                                                                                                                                                                                                                                                                                                                                                                                                                                                                                                                                                                                                                                                                                                                                 | IL-1Ra                                | IL-1α        |
|                                      |                                                                                                                                                                                                                                                                                                                                                                                                                                                                                                                                                                                                                                                                                                                                                                                                        | IL-16                                 | IL-13        |
|                                      |                                                                                                                                                                                                                                                                                                                                                                                                                                                                                                                                                                                                                                                                                                                                                                                                        | IL-17A                                | IL-15        |
|                                      |                                                                                                                                                                                                                                                                                                                                                                                                                                                                                                                                                                                                                                                                                                                                                                                                        | IL-18                                 | IL-17        |
|                                      |                                                                                                                                                                                                                                                                                                                                                                                                                                                                                                                                                                                                                                                                                                                                                                                                        | IL-27                                 | IL-18        |
|                                      |                                                                                                                                                                                                                                                                                                                                                                                                                                                                                                                                                                                                                                                                                                                                                                                                        | IL-27 (p28)                           | IL-19        |
|                                      |                                                                                                                                                                                                                                                                                                                                                                                                                                                                                                                                                                                                                                                                                                                                                                                                        | IL-29/IFN-λ1                          | IL-20        |
|                                      |                                                                                                                                                                                                                                                                                                                                                                                                                                                                                                                                                                                                                                                                                                                                                                                                        | Osteocalcin                           | IL-21        |
|                                      |                                                                                                                                                                                                                                                                                                                                                                                                                                                                                                                                                                                                                                                                                                                                                                                                        | Osteonectin                           | IL-22        |
|                                      |                                                                                                                                                                                                                                                                                                                                                                                                                                                                                                                                                                                                                                                                                                                                                                                                        | Osteopontin                           | IL-23        |
| Mullepex Multi-Species Hormone panel | # MS-HMAG-21K                                                                                                                                                                                                                                                                                                                                                                                                                                                                                                                                                                                                                                                                                                                                                                                          | IL-1Ra                                | IL-1α        |
|                                      |                                                                                                                                                                                                                                                                                                                                                                                                                                                                                                                                                                                                                                                                                                                                                                                                        | IL-16                                 | IL-13        |
|                                      |                                                                                                                                                                                                                                                                                                                                                                                                                                                                                                                                                                                                                                                                                                                                                                                                        | IL-17A                                | IL-15        |
|                                      |                                                                                                                                                                                                                                                                                                                                                                                                                                                                                                                                                                                                                                                                                                                                                                                                        | IL-18                                 | IL-17        |
|                                      |                                                                                                                                                                                                                                                                                                                                                                                                                                                                                                                                                                                                                                                                                                                                                                                                        | IL-27                                 | IL-18        |
|                                      |                                                                                                                                                                                                                                                                                                                                                                                                                                                                                                                                                                                                                                                                                                                                                                                                        | IL-27 (p28)                           | IL-19        |
|                                      |                                                                                                                                                                                                                                                                                                                                                                                                                                                                                                                                                                                                                                                                                                                                                                                                        | IL-29/IFN-λ1                          | IL-20        |
|                                      |                                                                                                                                                                                                                                                                                                                                                                                                                                                                                                                                                                                                                                                                                                                                                                                                        | Osteocalcin                           | IL-21        |
|                                      |                                                                                                                                                                                                                                                                                                                                                                                                                                                                                                                                                                                                                                                                                                                                                                                                        | Osteonectin                           | IL-22        |
|                                      |                                                                                                                                                                                                                                                                                                                                                                                                                                                                                                                                                                                                                                                                                                                                                                                                        | Osteopontin                           | IL-23        |
| Mullepex IGF panel                   | # F-MIL-HGFIMAG-52K-02                                                                                                                                                                                                                                                                                                                                                                                                                                                                                                                                                                                                                                                                                                                                                                                 | IL-1Ra                                | IL-1α        |
|                                      |                                                                                                                                                                                                                                                                                                                                                                                                                                                                                                                                                                                                                                                                                                                                                                                                        | IL-16                                 | IL-13        |
|                                      |                                                                                                                                                                                                                                                                                                                                                                                                                                                                                                                                                                                                                                                                                                                                                                                                        | IL-17A                                | IL-15        |
|                                      |                                                                                                                                                                                                                                                                                                                                                                                                                                                                                                                                                                                                                                                                                                                                                                                                        | IL-18                                 | IL-17        |
|                                      |                                                                                                                                                                                                                                                                                                                                                                                                                                                                                                                                                                                                                                                                                                                                                                                                        | IL-27                                 | IL-18        |
|                                      |                                                                                                                                                                                                                                                                                                                                                                                                                                                                                                                                                                                                                                                                                                                                                                                                        | IL-27 (p28)                           | IL-19        |
|                                      |                                                                                                                                                                                                                                                                                                                                                                                                                                                                                                                                                                                                                                                                                                                                                                                                        | IL-29/IFN-λ1                          | IL-20        |
|                                      |                                                                                                                                                                                                                                                                                                                                                                                                                                                                                                                                                                                                                                                                                                                                                                                                        | Osteocalcin                           | IL-21        |
|                                      |                                                                                                                                                                                                                                                                                                                                                                                                                                                                                                                                                                                                                                                                                                                                                                                                        | Osteonectin                           | IL-22        |
|                                      |                                                                                                                                                                                                                                                                                                                                                                                                                                                                                                                                                                                                                                                                                                                                                                                                        | Osteopontin                           | IL-23        |
| Lumines LISAH                        | # LXSAMW39                                                                                                                                                                                                                                                                                                                                                                                                                                                                                                                                                                                                                                                                                                                                                                                             | IL-1Ra                                | IL-1α        |
|                                      |                                                                                                                                                                                                                                                                                                                                                                                                                                                                                                                                                                                                                                                                                                                                                                                                        | IL-16                                 | IL-13        |
|                                      |                                                                                                                                                                                                                                                                                                                                                                                                                                                                                                                                                                                                                                                                                                                                                                                                        | IL-17A                                | IL-15        |
|                                      |                                                                                                                                                                                                                                                                                                                                                                                                                                                                                                                                                                                                                                                                                                                                                                                                        | IL-18                                 | IL-17        |
|                                      |                                                                                                                                                                                                                                                                                                                                                                                                                                                                                                                                                                                                                                                                                                                                                                                                        | IL-27                                 | IL-18        |
|                                      |                                                                                                                                                                                                                                                                                                                                                                                                                                                                                                                                                                                                                                                                                                                                                                                                        | IL-27 (p28)                           | IL-19        |
|                                      |                                                                                                                                                                                                                                                                                                                                                                                                                                                                                                                                                                                                                                                                                                                                                                                                        | IL-29/IFN-λ1                          | IL-20        |
|                                      |                                                                                                                                                                                                                                                                                                                                                                                                                                                                                                                                                                                                                                                                                                                                                                                                        | Osteocalcin                           | IL-21        |
|                                      |                                                                                                                                                                                                                                                                                                                                                                                                                                                                                                                                                                                                                                                                                                                                                                                                        | Osteonectin                           | IL-22        |
|                                      |                                                                                                                                                                                                                                                                                                                                                                                                                                                                                                                                                                                                                                                                                                                                                                                                        | Osteopontin                           | IL-23        |
| CE-TOFMS/LC-TOFMS                    | # DEIA-X2197                                                                                                                                                                                                                                                                                                                                                                                                                                                                                                                                                                                                                                                                                                                                                                                           | IL-1Ra                                | IL-1α        |
|                                      |                                                                                                                                                                                                                                                                                                                                                                                                                                                                                                                                                                                                                                                                                                                                                                                                        | IL-16                                 | IL-13        |
|                                      |                                                                                                                                                                                                                                                                                                                                                                                                                                                                                                                                                                                                                                                                                                                                                                                                        | IL-17A                                | IL-15        |
|                                      |                                                                                                                                                                                                                                                                                                                                                                                                                                                                                                                                                                                                                                                                                                                                                                                                        | IL-18                                 | IL-17        |
|                                      |                                                                                                                                                                                                                                                                                                                                                                                                                                                                                                                                                                                                                                                                                                                                                                                                        | IL-27                                 | IL-18        |
|                                      |                                                                                                                                                                                                                                                                                                                                                                                                                                                                                                                                                                                                                                                                                                                                                                                                        | IL-27 (p28)                           | IL-19        |
|                                      |                                                                                                                                                                                                                                                                                                                                                                                                                                                                                                                                                                                                                                                                                                                                                                                                        | IL-29/IFN-λ1                          | IL-20        |
|                                      |                                                                                                                                                                                                                                                                                                                                                                                                                                                                                                                                                                                                                                                                                                                                                                                                        | Osteocalcin                           | IL-21        |
|                                      |                                                                                                                                                                                                                                                                                                                                                                                                                                                                                                                                                                                                                                                                                                                                                                                                        | Osteonectin                           | IL-22        |
|                                      |                                                                                                                                                                                                                                                                                                                                                                                                                                                                                                                                                                                                                                                                                                                                                                                                        | Osteopontin                           | IL-23        |
| Blood biochemistry                   | The circulating levels of cytokines and hormones in serum were measured with the following multiplex assays: Bio-Plex (Bio-Rad Laboratories - Hercules, CA, USA), Milliplex (Merck Millipore, Burlington, MA, USA) and Lumines (R&D Systems, Minneapolis, MN, USA) and enzyme-linked immunosorbent assay (ELISA). Over 1,200 metabolites in plasma were measured with a capillary electrophoresis and liquid chromatography-mass spectrometry-based system (Duo Scan, Human Metabolome Technologies, Boston, MA, USA); the details of the instruments and measured metabolites are shown on the manufacturer websites (https://en.humanmetabolome.com). ELISA, enzyme-linked immunosorbent assay; HDL, high-density lipoprotein; LDL, low-density lipoprotein; TOFMS, time of flight mass spectrometry | Albumin                               |              |
|                                      |                                                                                                                                                                                                                                                                                                                                                                                                                                                                                                                                                                                                                                                                                                                                                                                                        | Cholesterol                           |              |
|                                      |                                                                                                                                                                                                                                                                                                                                                                                                                                                                                                                                                                                                                                                                                                                                                                                                        | HDL cholesterol                       |              |
|                                      |                                                                                                                                                                                                                                                                                                                                                                                                                                                                                                                                                                                                                                                                                                                                                                                                        | LDL cholesterol                       |              |
|                                      |                                                                                                                                                                                                                                                                                                                                                                                                                                                                                                                                                                                                                                                                                                                                                                                                        | Total cholesterol                     |              |
|                                      |                                                                                                                                                                                                                                                                                                                                                                                                                                                                                                                                                                                                                                                                                                                                                                                                        | Triglyceride                          |              |
|                                      |                                                                                                                                                                                                                                                                                                                                                                                                                                                                                                                                                                                                                                                                                                                                                                                                        | Insulin                               |              |
|                                      |                                                                                                                                                                                                                                                                                                                                                                                                                                                                                                                                                                                                                                                                                                                                                                                                        | Urea nitrogen                         |              |
|                                      |                                                                                                                                                                                                                                                                                                                                                                                                                                                                                                                                                                                                                                                                                                                                                                                                        | Creatinine                            |              |
|                                      |                                                                                                                                                                                                                                                                                                                                                                                                                                                                                                                                                                                                                                                                                                                                                                                                        | Glucose                               |              |

**Supplementary Table 2. Dermal ECM-related genes analyzed in this study**

| Gene Symbol | Gene Name                                | TaqMan® Assay ID |
|-------------|------------------------------------------|------------------|
| COL1A1      | collagen type I alpha 1                  | Hs00164004_m1    |
| COL1A2      | collagen type I alpha 2 chain            | Hs01028956_m1    |
| COL3A1      | collagen type III alpha 1 chain          | Hs00943809_m1    |
| COL5A1      | collagen type V alpha 1                  | Hs00609133_m1    |
| COL6A1      | collagen type VI alpha 1                 | Hs01095585_m1    |
| COL12A1     | collagen type XII alpha 1 chain          | Hs00189184_m1    |
| COL14A1     | collagen type XIV alpha 1 chain          | Hs00964045_m1    |
| HAS2        | hyaluronan synthase 2                    | Hs00193435_m1    |
| HAS1        | hyaluronan synthase 1                    | Hs00758053_m1    |
| DCN         | decorin                                  | Hs00754870_s1    |
| BGN         | biglycan                                 | Hs00156076_m1    |
| VCAN        | versican                                 | Hs00171642_m1    |
| CHPF        | chondroitin polymerizing factor          | Hs00226041_m1    |
| CHSY1       | chondroitin sulfate synthase 1           | Hs00208704_m1    |
| CHSY3       | chondroitin sulfate synthase 3           | Hs02380326_s1    |
| ELN         | elastin                                  | Hs00355783_m1    |
| GAPDH       | glyceraldehyde-3-phosphate dehydrogenase | Hs02786624_g1    |

The expression level of dermal extracellular matrix-related genes listed above was analyzed by real-time PCR with the primers and probes of TaqMan® gene expression assays.

ECM, extracellular matrix; PCR, polymerase chain reaction
